# Supplementary material
Source: MDPI journal article supplement (https://www.mdpi.com/2227-7102/2/4/165)
Supplement: s1 [file s1]

*Correction*

**Correction: Kate Hawkey, History and Super Diversity.  
*Education Sciences* 2012, 2, 165-179**

**Kate Hawkey**

Graduate School of Education, University of Bristol, Bristol, BS8 1JA, UK;

E-Mail: [kate.hawkey@bristol.ac.uk](mailto:kate.hawkey@bristol.ac.uk)

*Received: 13 March 2013 / Accepted: 19 March 2013 / Published: 21 March 2013*

---

In the article detailed above figure 1 on page 174 in [1] is incorrect. The correct figure should be:

**Figure 1.** Children's experience of history in school.

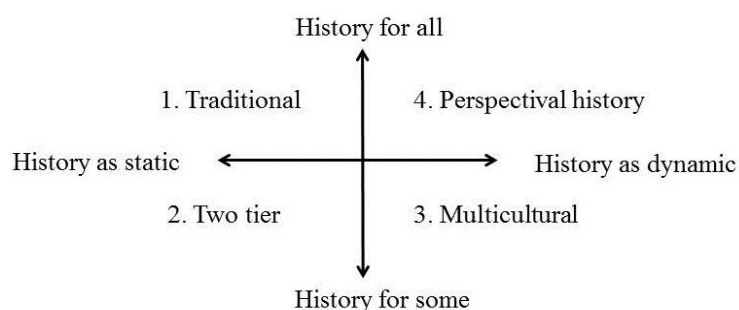

**Reference**

1. Hawkey, K. History and super diversity. *Educ. Sci.* **2012**, *2*, 165–179.

© 2013 by the authors; licensee MDPI, Basel, Switzerland. This article is an open access article distributed under the terms and conditions of the Creative Commons Attribution license (<http://creativecommons.org/licenses/by/3.0/>).
